# Supplementary material for: Clonal diversity and genetic profiling of antibiotic resistance among multidrug/carbapenem-resistant Klebsiella pneumoniae isolates from a tertiary care hospital in Saudi Arabia
Source: Springer Nature journal article supplement (doi:10.1186/s12879-018-3114-9), 2018-05-03

Diversity Graph for loci *gapA*, *mdh*, *pgi*, *phoE*:

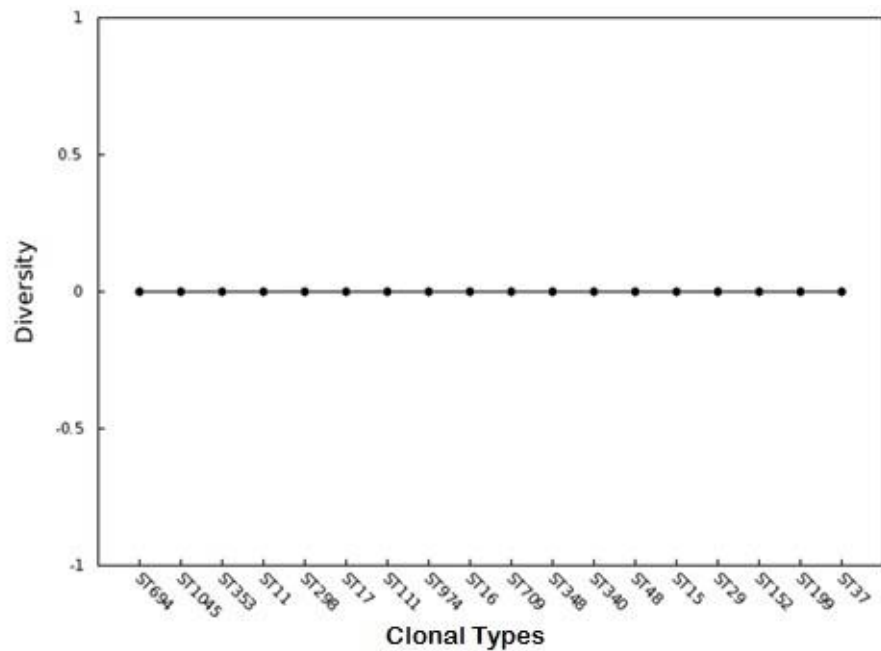

Diversity Graph for locus *rpoB*:

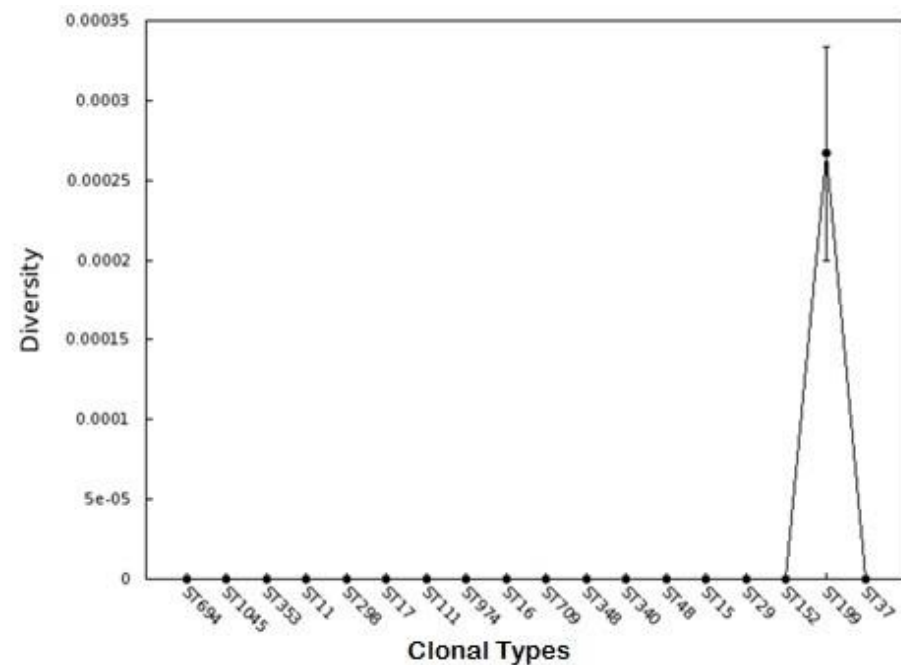

Diversity Graph for locus *infB*:

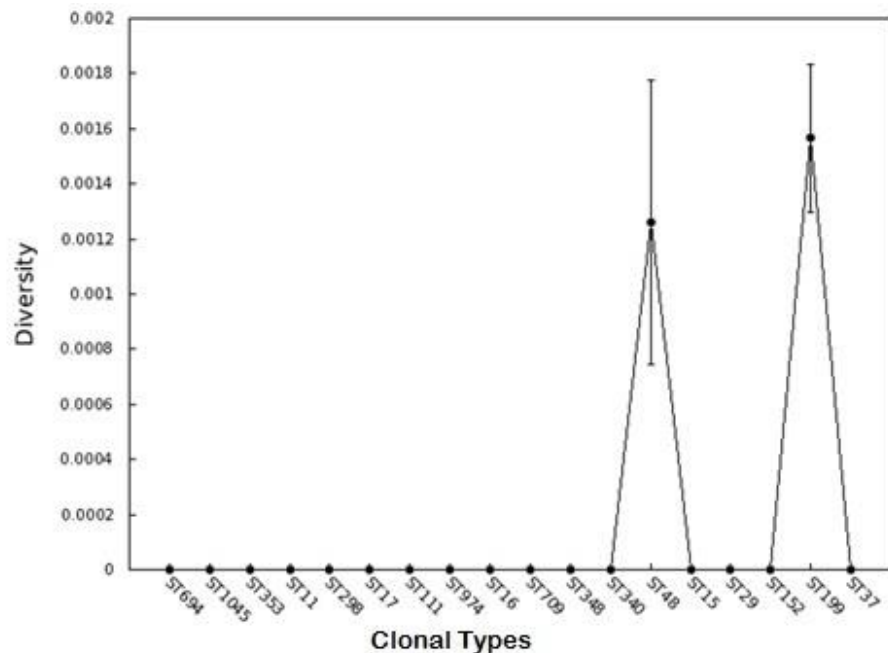

Diversity Graph for locus *tonB*:

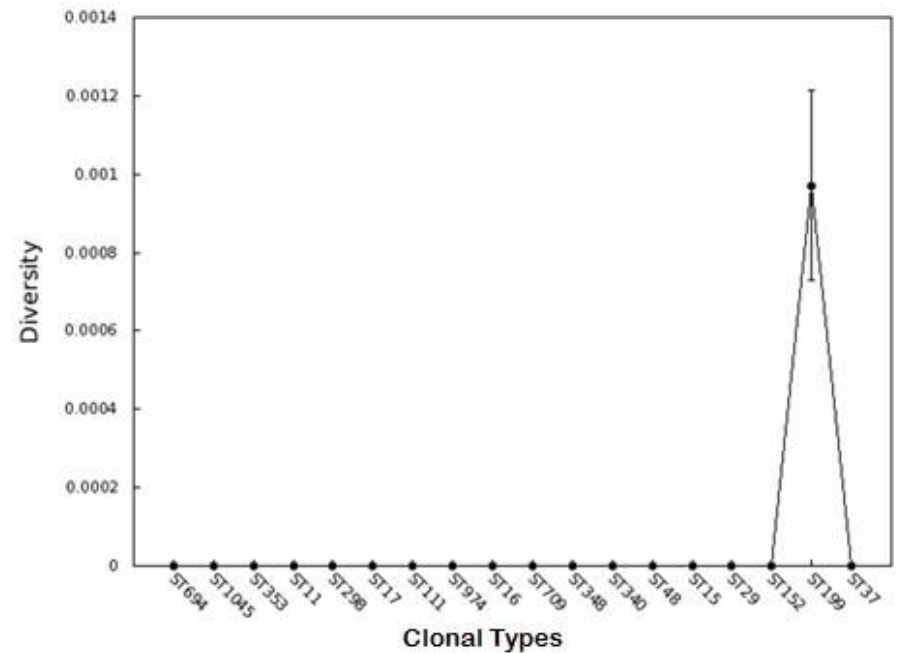

Supplement: MOESM2 [file 15736896]
